# Supplementary material for: Nickel nanoparticles highly dispersed in silica pillared clay as an efficient catalyst for chlorobenzene dechlorination
Source: Royal Society of Chemistry journal article supplement (doi:10.1039/c5ra05926g), 2015-01-01
Supplement: c5ra05926g1.pdf [file c5ra05926g1.pdf]

RSC Advance –Electronic Supplementary Information

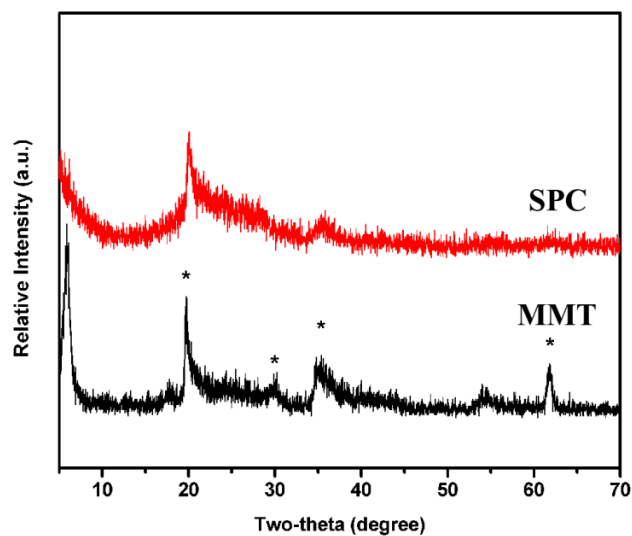

Fig.1S Wide angle XRD patterns of SPC and MMT.

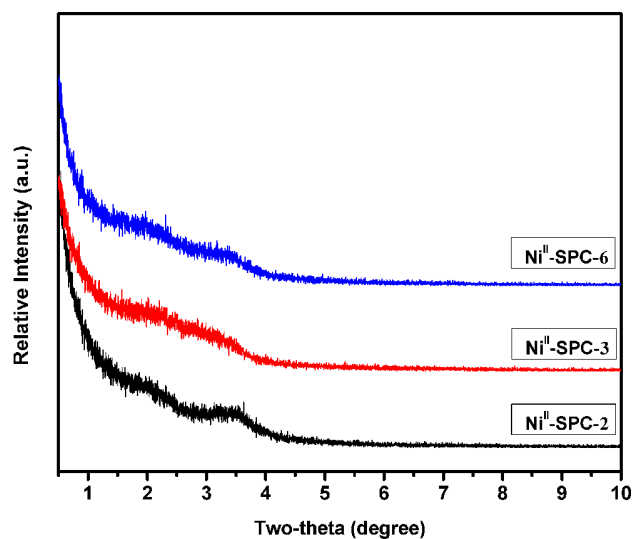

Fig.2S Low angle XRD patterns of Ni<sup>II</sup>-SPCs.

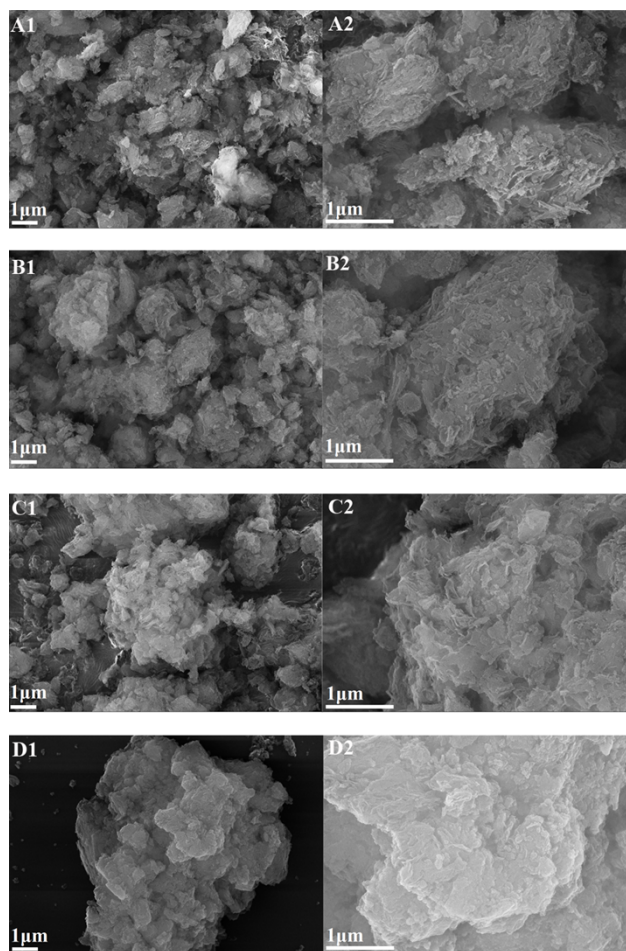

**Fig.3S SEM images of the compared samples: (A) Ni<sup>0</sup>/SPC-6, (B) Ni<sup>0</sup>/SPC-3, (C) Ni<sup>0</sup>/SPC-2, (D) SPC.**

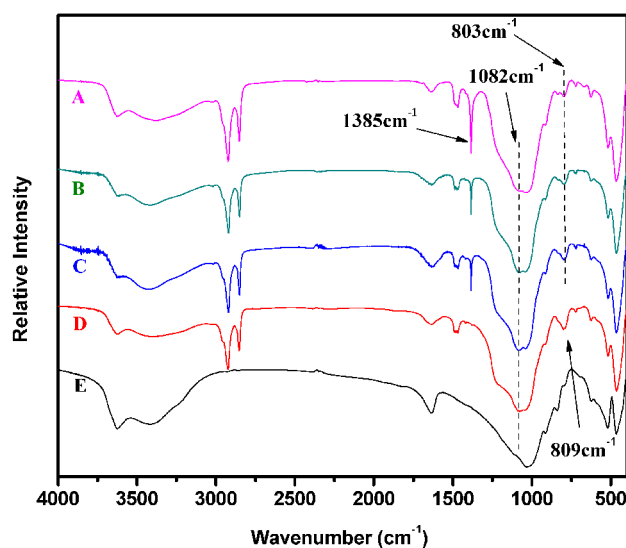

**Fig.4S FTIR patterns for (A) Ni<sup>II</sup>-SPC-6, (B) Ni<sup>II</sup>-SPC-3, (C) Ni<sup>II</sup>-SPC-2, (D) SPC, (E) MMT.**

Fig. 4S shows the FTIR spectra of the products in the range of 4000 - 450 cm<sup>-1</sup>. The strong and wide bands around 1200 - 1000 cm<sup>-1</sup> are associated to the asymmetric Si-O stretching modes. The Ni<sup>II</sup>-SPCs and SPC have the much sharper bands at 1082 cm<sup>-1</sup> than natural montmorillonite, this suggests that the crystallinity of the particles increased and the particles became more compact.<sup>[32]</sup>

The characteristic band of Si-O-Si in  $809\text{ cm}^{-1}$  could be observed for SPC. However, the band of  $\text{Ni}^{\text{II}}$ -SPCs at  $809\text{ cm}^{-1}$  has a slight red-shift to  $803\text{ cm}^{-1}$ . This may have been due to an interaction between the nickel atoms and silicon (forming Ni-O-Si bonds)<sup>[40,42]</sup>. And these results indicate that there is silica structure had been planted into the interlayer of clay. Moreover, a strong sharp band at  $1385\text{ cm}^{-1}$  exists at the FTIR spectra of  $\text{Ni}^{\text{II}}$ -SPC-6,  $\text{Ni}^{\text{II}}$ -SPC-3 and  $\text{Ni}^{\text{II}}$ -SPC-2. With the incorporation of Ni (II) into the gallery silica framework, the intensity of  $1385\text{ cm}^{-1}$  bands increase with the increase of molar of nickel nitrate hexahydrate ammonia solution during graft process. Furthermore, the intensity of the band at  $1385\text{ cm}^{-1}$  increases with the nickel content increases, which is usually taken as proof of the Ni-O-Si in the gallery frame structure.

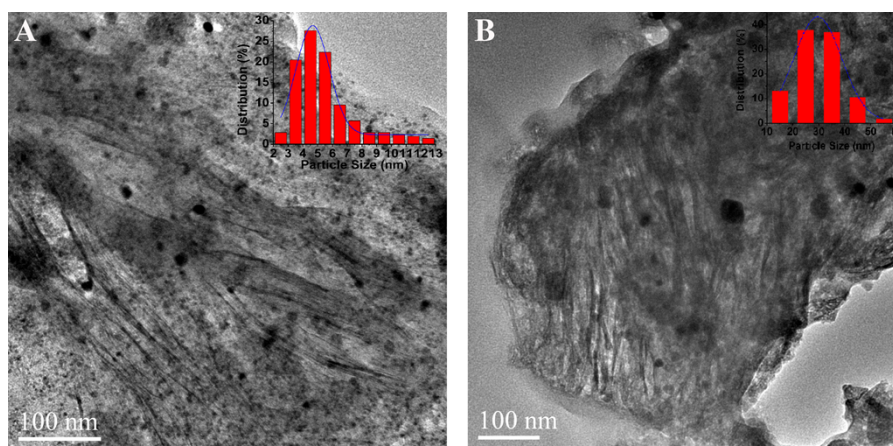

**Fig. 5S TEM images of (A) Ni<sup>0</sup>-SPC-6 and (B) Ni<sup>0</sup>/SPC-6 after five times of catalytic reaction, respectively.**
